# Supplementary material for: Towards an in-depth characterization of Symbiodiniaceae in tropical giant clams via metabarcoding of pooled multi-gene amplicons
Source: PeerJ journal article supplement (doi:10.7717/peerj.6898), 2019-05-13
Supplement: FigureS1.pdf [file FigureS1.pdf]

A) Forward LSU primer (LSU1F\_illu: 5'- GCG GAG GAA AAG RAA CTA A -3')

|                          | 450 | 453 | 460 | 471 | 480 |
|--------------------------|-----|-----|-----|-----|-----|
| Consensus                | G   | G   | G   | G   | G   |
| Identity                 | G   | G   | G   | G   | G   |
| 1. T1_C1_1_S7.4          | A   | G   | T   | A   | A   |
| 2. Tub1_C1_2_S7.5        | A   | G   | T   | A   | A   |
| 3. Tub3_C15_2_S7.8       | A   | G   | T   | A   | A   |
| 4. Tub3_C15_2_S7.6       | A   | G   | T   | A   | A   |
| 5. Tub3_C15_1_S7.7       | A   | G   | T   | A   | A   |
| 6. Tub6_C90_1_S10.3      | A   | G   | T   | A   | A   |
| 7. Tub6_C90_2_S10.4      | A   | G   | T   | A   | A   |
| 8. Tub6_C90_3_S7.13      | A   | G   | T   | A   | A   |
| 9. Tub8_C91_1_S7.16      | A   | G   | T   | A   | A   |
| 10. Tub8_C91_2_S7.17     | A   | G   | T   | A   | A   |
| 11. Tub8_C91_3_S7.19     | A   | G   | T   | A   | A   |
| 12. Tub80_H1_1_S7.22     | A   | G   | T   | A   | A   |
| 13. Tub80_H1_2_S7.23     | A   | G   | T   | A   | A   |
| 14. Tub92_H1a_1_S7.35    | A   | G   | T   | A   | A   |
| 15. Tub92_H1a_2_S7.33    | A   | G   | T   | A   | A   |
| 16. 133_F5.1_1           | A   | G   | T   | A   | A   |
| 17. 133_F5.1_2           | A   | G   | T   | A   | A   |
| 18. 133_F5.1_3           | A   | G   | T   | A   | A   |
| 19. Sin_F5.1d_1          | A   | G   | T   | A   | A   |
| 20. Sin_F5.1d_2          | A   | G   | T   | A   | A   |
| 21. Sin_F5.1d_3          | A   | G   | T   | A   | A   |
| 22. Mv_F1_1              | A   | G   | T   | A   | A   |
| 23. Mv_F1_3              | A   | G   | T   | A   | A   |
| 24. Mv_F1_2              | A   | G   | T   | A   | A   |
| 25. F2_LSU_s66.25_1      | A   | G   | T   | A   | A   |
| 26. F2_LSU_s66.30_3      | A   | G   | T   | A   | A   |
| 27. F2a_LSU_s66.43_1     | A   | G   | T   | A   | A   |
| 28. F2a_LSU_s66.44_2     | A   | G   | T   | A   | A   |
| 29. F2a_LSU_s66.45_3     | A   | G   | T   | A   | A   |
| 30. F3.1a_LSU_s67.1_1    | A   | G   | T   | A   | A   |
| 31. F3.1a_LSU_s67.2_2    | A   | G   | T   | A   | A   |
| 32. F3.1a_LSU_s67.5_3    | A   | G   | T   | A   | A   |
| 33. F3.2_LSU_s67.19_1    | A   | G   | T   | A   | A   |
| 34. F3.2_LSU_s67.20_2    | A   | G   | T   | A   | A   |
| 35. F3.2_LSU_s67.16_3    | A   | G   | T   | A   | A   |
| 36. F4.1_LSU_s67.26_1    | A   | G   | T   | A   | A   |
| 37. F4.1_LSU_s67.28_2    | A   | G   | T   | A   | A   |
| 38. F4.1_LSU_s67.30_3    | A   | G   | T   | A   | A   |
| 39. F4.8_LSU_s67.41_1    | A   | G   | T   | A   | A   |
| 40. F4.8_LSU_s67.38_2    | A   | G   | T   | A   | A   |
| 41. F4.8_LSU_s67.39_3    | A   | G   | T   | A   | A   |
| 42. Mf_F5.2g_1           | A   | G   | T   | A   | A   |
| 43. Mf_F5.2g_2           | A   | G   | T   | A   | A   |
| 44. Mf_F5.2g_3           | A   | G   | T   | A   | A   |
| 45. 703_B19_1            | A   | G   | T   | A   | A   |
| 46. 703_B19_2            | A   | G   | T   | A   | A   |
| 47. 704_B1_1             | A   | G   | T   | A   | A   |
| 48. 704_B1_2             | A   | G   | T   | A   | A   |
| 49. 704_B1_3             | A   | G   | T   | A   | A   |
| 50. P.Flex_B2_1          | A   | G   | T   | A   | A   |
| 51. P.Flex_B2_2          | A   | G   | T   | A   | A   |
| 52. P.Flex_B2_3          | A   | G   | T   | A   | A   |
| 53. nr-11                | A   | G   | T   | A   | A   |
| 54. nr-12                | A   | G   | T   | A   | A   |
| 55. nr-13                | A   | G   | T   | A   | A   |
| 56. nr-14                | A   | G   | T   | A   | A   |
| 57. A001_D1_1            | A   | G   | T   | A   | A   |
| 58. A001_D1_2            | A   | G   | T   | A   | A   |
| 59. A001_D1_3            | A   | G   | T   | A   | A   |
| 60. Ap02_D1a_1           | A   | G   | T   | A   | A   |
| 61. Ap02_D1a_2           | A   | G   | T   | A   | A   |
| 62. Ap02_D1a_3           | A   | G   | T   | A   | A   |
| 63. P5P105_D1.2_1        | A   | G   | T   | A   | A   |
| 64. P5P105_D1.2_2        | A   | G   | T   | A   | A   |
| 65. P5P105_D1.2_3        | A   | G   | T   | A   | A   |
| 66. D1.1_LSU_s66.13_1    | A   | G   | T   | A   | A   |
| 67. D1.1_LSU_s66.14_2    | A   | G   | T   | A   | A   |
| 68. D1.1_LSU_s66.15_3    | A   | G   | T   | A   | A   |
| 69. G3_2a_S5U/LSU_s43.21 | A   | G   | T   | A   | A   |
| 70. G3_2b_S5U/LSU_s43.22 | A   | G   | T   | A   | A   |
| 71. G3_2c_S5U/LSU_s43.15 | A   | G   | T   | A   | A   |
| 72. RN3_1_S5U/LSU_s43.10 | A   | G   | T   | A   | A   |
| 73. RN3_2_S5U/LSU_s43.11 | A   | G   | T   | A   | A   |
| 74. RN3_3_S5U/LSU_s43.12 | A   | G   | T   | A   | A   |
| 75. Tub72_G2b_2_S7.36    | A   | G   | T   | A   | A   |
| 76. Tub72_G2b_2_S7.41    | A   | G   | T   | A   | A   |
| 77. Tub77_G2_1_S10.29    | A   | G   | T   | A   | A   |
| 78. Tub77_G2_2_S10.31    | A   | G   | T   | A   | A   |
| 79. RT-383_E1_1          | A   | G   | T   | A   | A   |
| 80. RT-383_E1_2          | A   | G   | T   | A   | A   |
| 81. RT-383_E1_3          | A   | G   | T   | A   | A   |
| 82. 708_A1_1_1           | A   | G   | T   | A   | A   |
| 83. 708_A1_1_2           | A   | G   | T   | A   | A   |
| 84. 708_A1_1_3           | A   | G   | T   | A   | A   |
| 85. 725_A3_1             | A   | G   | T   | A   | A   |
| 86. 725_A3_2             | A   | G   | T   | A   | A   |
| 87. 725_A3_3             | A   | G   | T   | A   | A   |
| 88. RT-23_A2_1_1         | A   | G   | T   | A   | A   |
| 89. RT-23_A2_1_2         | A   | G   | T   | A   | A   |
| 90. RT-23_A2_1_3         | A   | G   | T   | A   | A   |
| 91. RT-89_A2_2_1         | A   | G   | T   | A   | A   |
| 92. RT-89_A2_2_2         | A   | G   | T   | A   | A   |
| 93. RT-89_A2_2_3         | A   | G   | T   | A   | A   |
| 94. 419_1_Gsimplex       | A   | G   | T   | A   | A   |
| 95. 419_2_Gsimplex       | A   | G   | T   | A   | A   |
| 96. 419_3_Gsimplex       | A   | G   | T   | A   | A   |
| 97. PELAG1_S7.48         | A   | G   | T   | A   | A   |
| 98. PELAG1_S7.49         | A   | G   | T   | A   | A   |
| 99. 1383_1_Pglac         | A   | G   | T   | A   | A   |
| 100. 1383_2_Pglac        | A   | G   | T   | A   | A   |
| 101. 1383_3_Pglac        | A   | G   | T   | A   | A   |
