# Supplementary material for: Towards an in-depth characterization of Symbiodiniaceae in tropical giant clams via metabarcoding of pooled multi-gene amplicons
Source: PeerJ journal article supplement (doi:10.7717/peerj.6898), 2019-05-13
Supplement: FigureS3.pdf [file FigureS3.pdf]

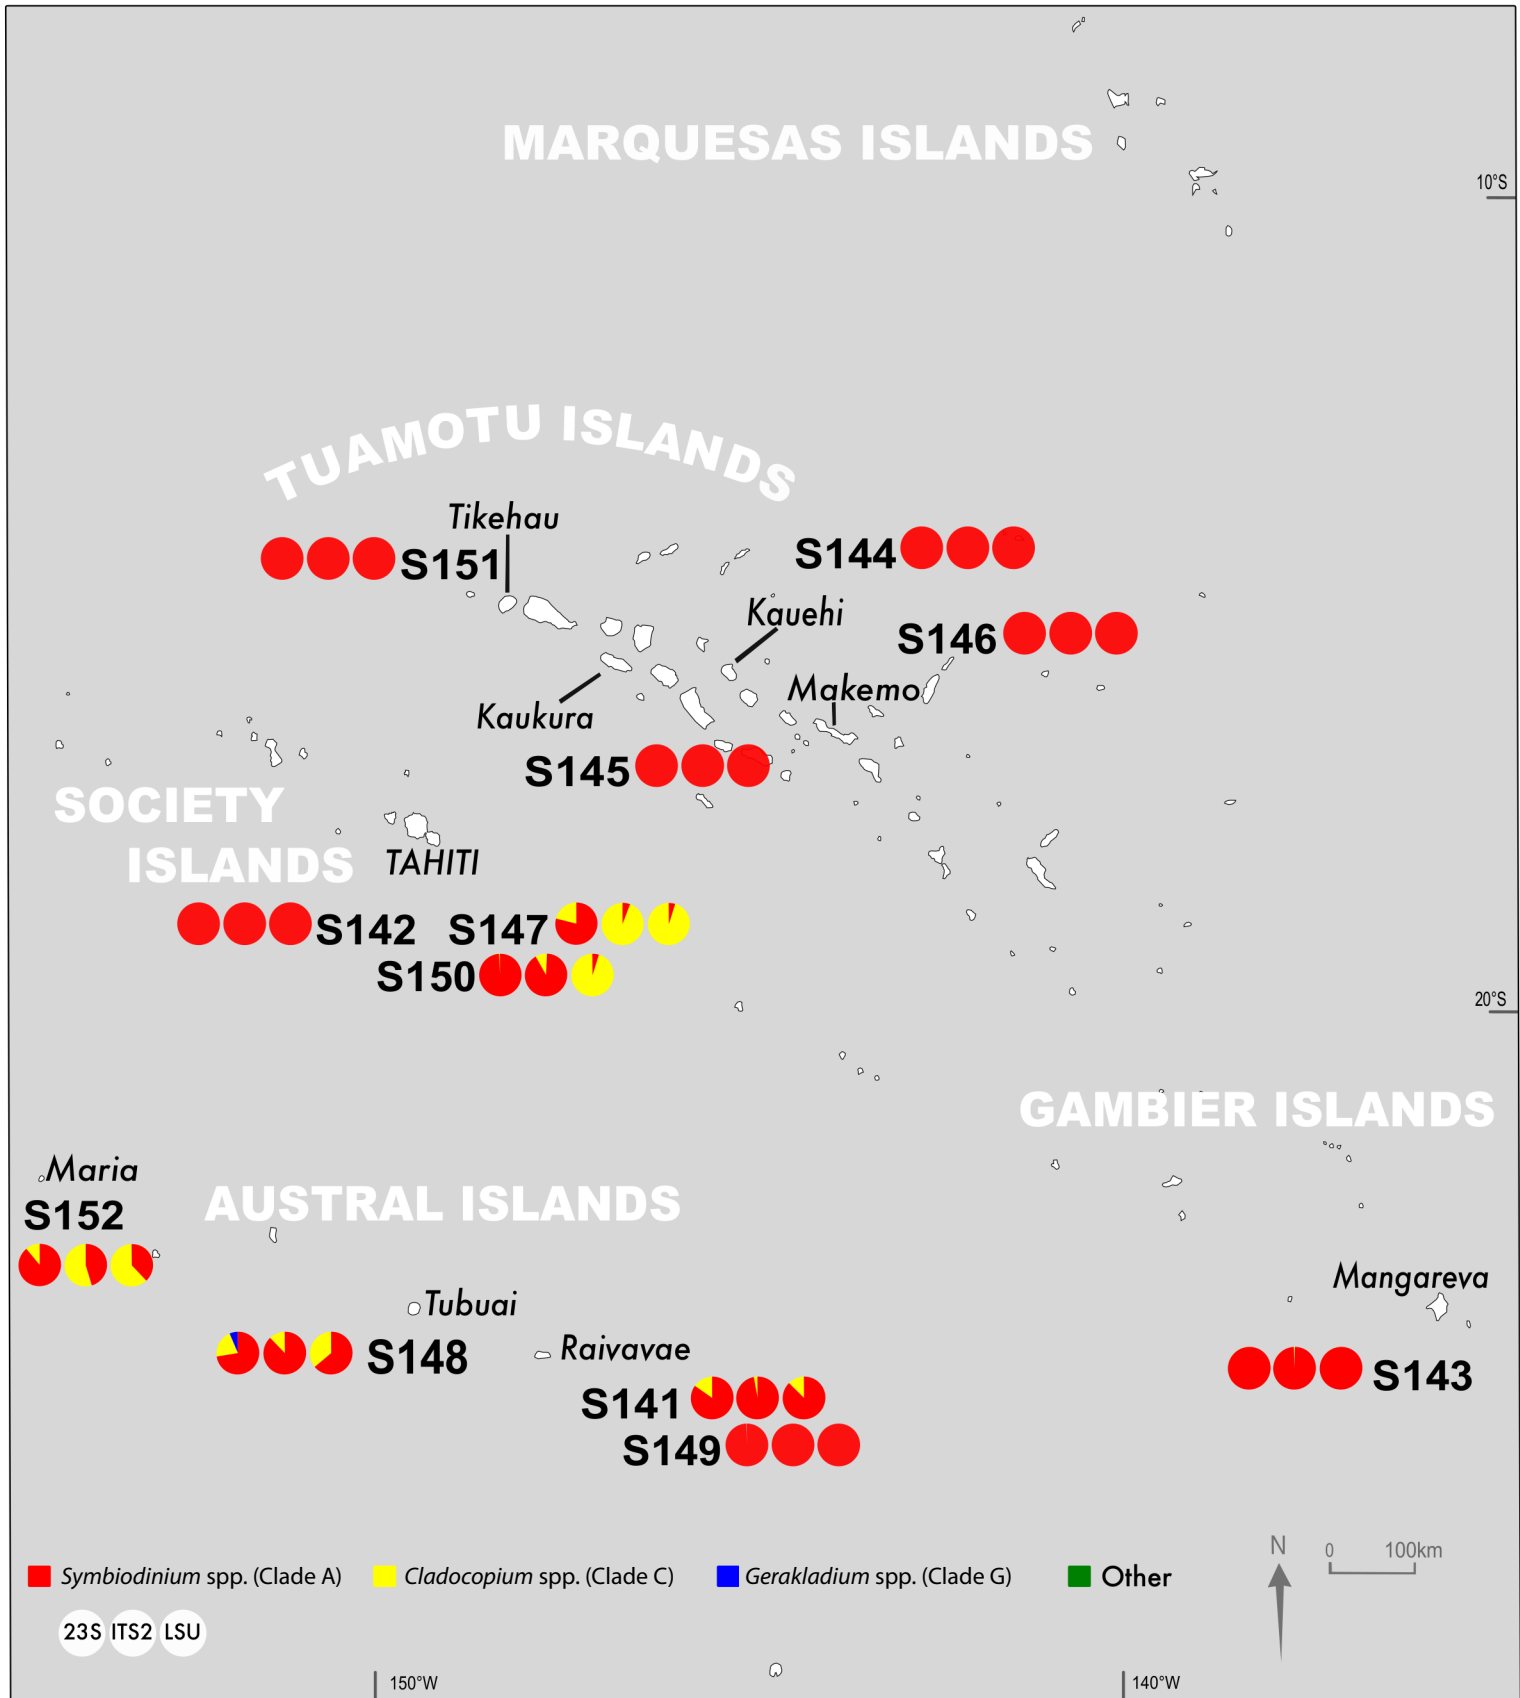

**Figure S2** Distribution of Symbiodiniaceae genera in *Tridacna maxima* obtained from each of the three datasets (left to right: 23S, ITS2, and LSU) per sample identification (S141-152).
